# Supplementary material for: Riceberry rice beverage decreases postprandial glycemic response, inflammatory markers and antioxidant status induced by a high-carbohydrate and moderate-fat meal in overweight and obese men
Source: Royal Society of Chemistry journal article supplement (doi:10.1039/d1fo03169d), 2021-12-14
Supplement: d1fo03169d2.pdf [file d1fo03169d2.pdf]

**Supplementary file 2.** Nutritional information of the test meal and beverage

| Composition                | HCMF        | HCMF + RRB |
|----------------------------|-------------|------------|
| <b>Meal</b>                |             |            |
| White bread (Slices)       | 4           | 4          |
| Condensed milk (g)         | 10          | 10         |
| Butter (g)                 | 15          | 15         |
| <b>Beverage</b>            |             |            |
| Water (mL)                 | 400         | 400        |
| Sugar (g)                  | 10          | 10         |
| Riceberry rice extract (g) | -           | 2          |
| Total calories (kcal)      | 535         | 535        |
| CHO : Fat : Protein        | 67 : 27 : 6 | 67 : 27: 6 |

CHO: Carbohydrate; HCMF: a high carbohydrate and moderate fat meal; RRB: riceberry rice beverage

| Composition                  | Carbohydrate (g) | Fat (g) | Protein (g) | Energy (kcal) |
|------------------------------|------------------|---------|-------------|---------------|
| <b>Meal</b>                  |                  |         |             |               |
| White bread (155 g/ 4slices) | 71               | 2       | 6           | 326           |
| Condensed milk (10 g)        | 8                | 0       | 0.5         | 34            |
| Butter (15 g)                | 0                | 15      | 0           | 135           |
| <b>Beverage</b>              |                  |         |             |               |
| Water (400 mL)               | 0                | 0       | 0           | 0             |
| Sugar (10 g)                 | 10               | 0       | 0           | 40            |
| Total calories (kcal)        | 356              | 153     | 26          | 535           |
| CHO : Fat : Protein          | 67               | 28      | 5           | -             |
